# Supplementary material for: Circadian rhythms in metabolic organs and the microbiota during acute fasting in mice
Source: PubMed Central journal article supplement (PMC9295129; doi:10.14814/phy2.15393), 2022-07-19
Supplement: PHY2-10-e15393-s001.pdf [file PHY2-10-e15393-s001.pdf]

# Supplementary Figure S1

■ **AL Fed** ANOVA  
■ **Fasted** Feeding/Time/Interaction

**A**

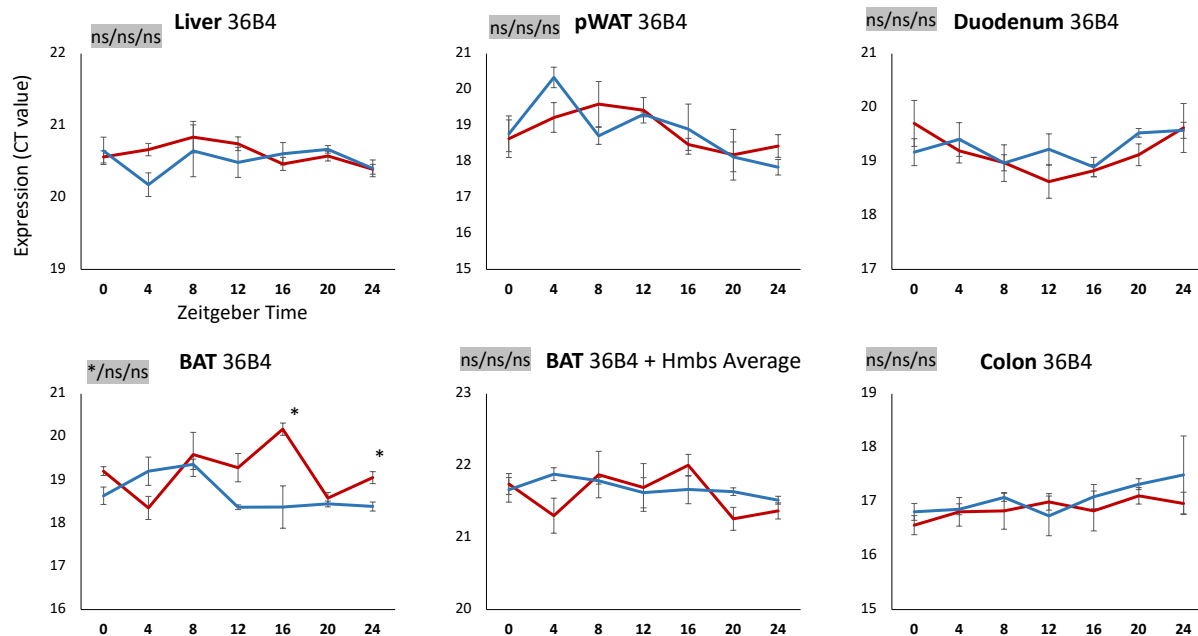

**B**

| CIRCADIAN |          | ANOVA   |        |             |
|-----------|----------|---------|--------|-------------|
| Tissue    | Gene     | Feeding | Time   | Interaction |
| Liver     | Bmal1    | p=.05   | ***    | ***         |
| Liver     | Clock    | ns      | **     | ns          |
| Liver     | Dbp      | ns      | **     | ***         |
| Liver     | Per1     | ns      | p=.06  | *           |
| Liver     | Per2     | ns      | *      | **          |
| Liver     | Per3     | ns      | ***    | ***         |
| Liver     | Cry1     | ns      | **     | **          |
| Liver     | Cry2     | ns      | ***    | ns          |
| Liver     | Rev-eba  | **      | ns     | ns          |
| Liver     | Rev-erbβ | ns      | *      | **          |
| Liver     | Rora     | ns      | **     | ***         |
| Liver     | Rory     | *       | **     | ***         |
| PWAT      | Bmal1    | *       | *      | ***         |
| PWAT      | Clock    | ns      | ns     | ns          |
| PWAT      | Dbp      | ns      | *      | ***         |
| PWAT      | Per1     | ns      | ns     | *           |
| PWAT      | Per2     | ns      | **     | *           |
| PWAT      | Per3     | ns      | ***    | **          |
| PWAT      | Cry1     | ns      | ns     | **          |
| PWAT      | Cry2     | ns      | ***    | ns          |
| PWAT      | Rev-eba  | ns      | ns     | *           |
| PWAT      | Rev-erbβ | ns      | **     | *           |
| PWAT      | Rora     | ns      | ns     | ns          |
| BAT       | Bmal1    | **      | *      | ***         |
| BAT       | Clock    | ns      | p=.05  | ns          |
| BAT       | Dbp      | ns      | **     | ***         |
| BAT       | Per1     | ns      | p=.065 | **          |
| BAT       | Per2     | ***     | ns     | **          |
| BAT       | Per3     | ns      | p=.06  | **          |
| BAT       | Cry1     | *       | ns     | **          |
| BAT       | Cry2     | ns      | *      | ns          |
| BAT       | Rev-eba  | ns      | p=.06  | *           |
| BAT       | Rev-erbβ | ns      | *      | **          |
| BAT       | Rora     | ns      | ns     | **          |
| Duodenum  | Bmal1    | ns      | ***    | ns          |
| Duodenum  | Clock    | *       | ns     | ns          |
| Duodenum  | Dbp      | ns      | ***    | ns          |
| Duodenum  | Per1     | ns      | ***    | ns          |
| Duodenum  | Per2     | p=.07   | ns     | ns          |
| Duodenum  | Per3     | ns      | ***    | ns          |
| Duodenum  | Cry1     | ns      | ***    | ns          |
| Duodenum  | Cry2     | ns      | **     | ns          |
| Duodenum  | Rev-eba  | ns      | ns     | ns          |
| Duodenum  | Rev-erbβ | ns      | ***    | ns          |
| Duodenum  | Rora     | ns      | ***    | p=.06       |
| Colon     | Bmal1    | ns      | ***    | ns          |
| Colon     | Clock    | ns      | ns     | ns          |
| Colon     | Dbp      | ns      | ***    | ns          |
| Colon     | Per1     | ns      | *      | n**         |
| Colon     | Per2     | *       | ***    | ns          |
| Colon     | Per3     | ns      | ***    | *           |
| Colon     | Cry1     | ns      | **     | ns          |
| Colon     | Cry2     | ns      | ns     | ns          |
| Colon     | Rev-eba  | ns      | ***    | ns          |
| Colon     | Rev-erbβ | ns      | ***    | ns          |
| Colon     | Rora     | ns      | ns     | *           |
| Liver     | Cyp7a1   | *       | ***    | *           |
| Liver     | SREBP1c  | ns      | ns     | ***         |
| Liver     | Nampt    | ns      | **     | **          |
| Liver     | Fgf21    | ns      | ns     | **          |
| Liver     | Acc1     | ns      | ns     | ***         |
| PWAT      | PPARγ    | ns      | **     | ns          |
| BAT       | Angptl4  | *       | ***    | ***         |
| Duodenum  | HMGCS2   | **      | ns     | *           |

# Supplementary Figure S2

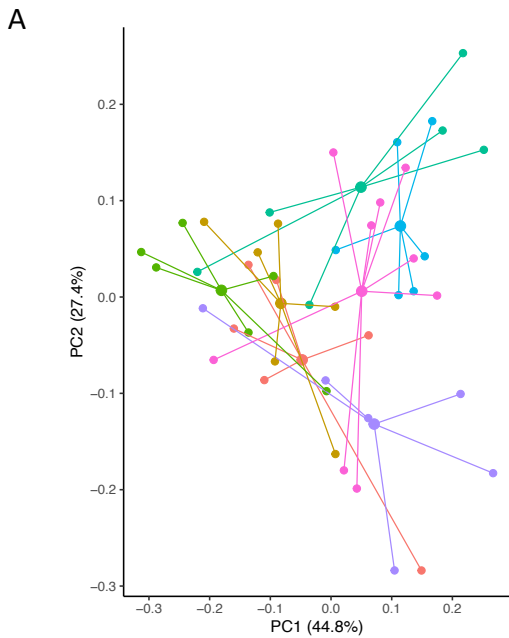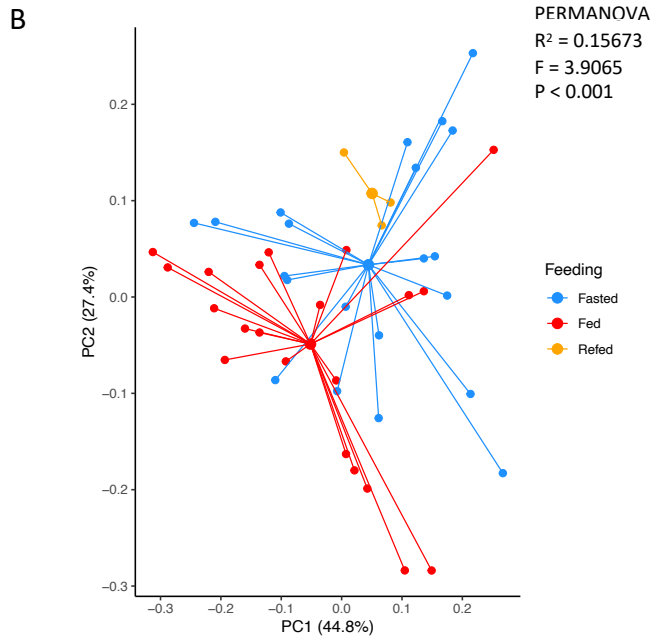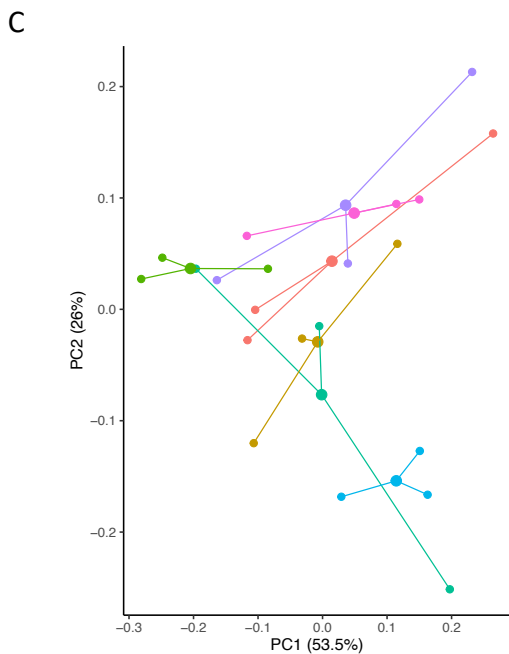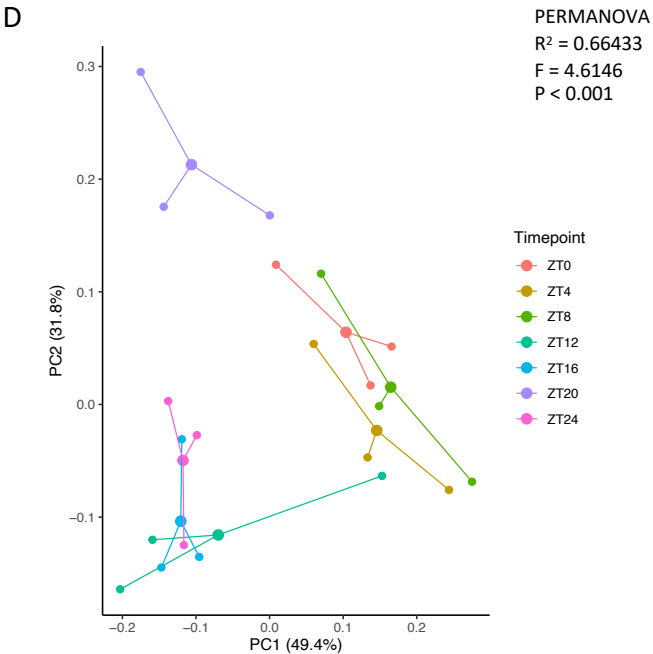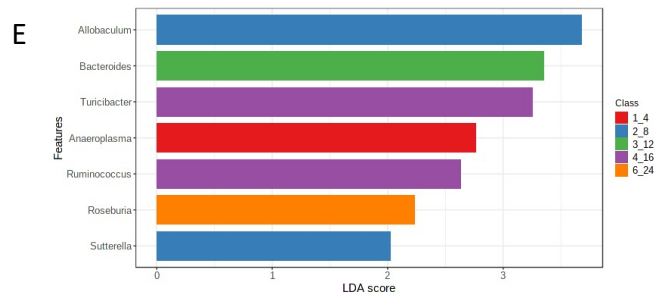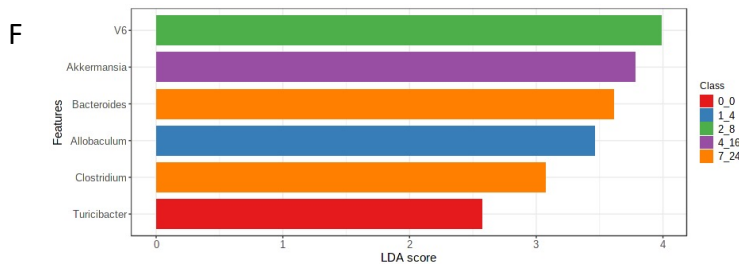

# Supplementary Figure S3

A

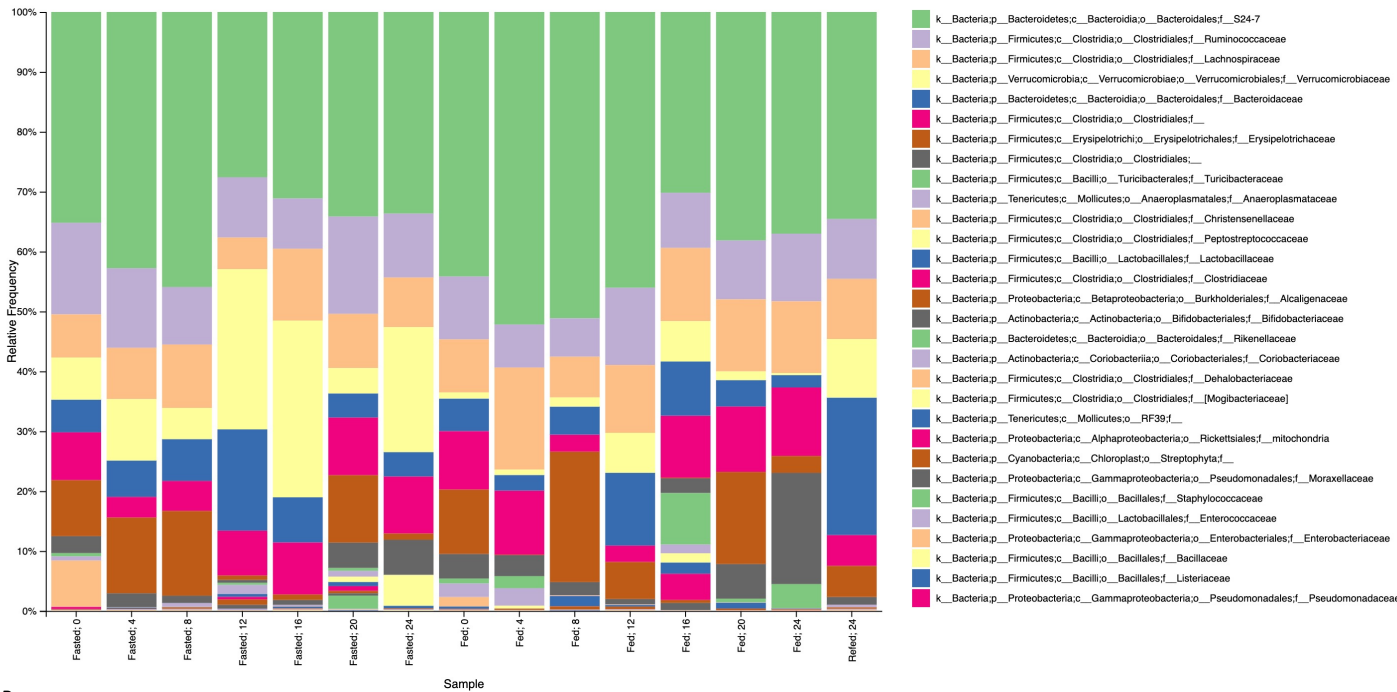

B

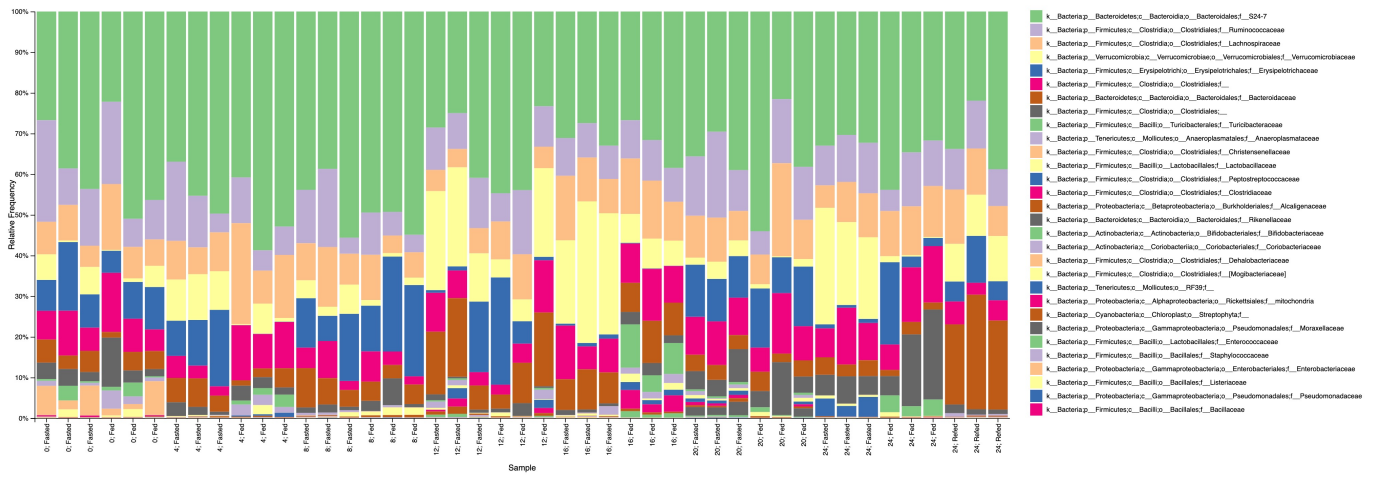

C

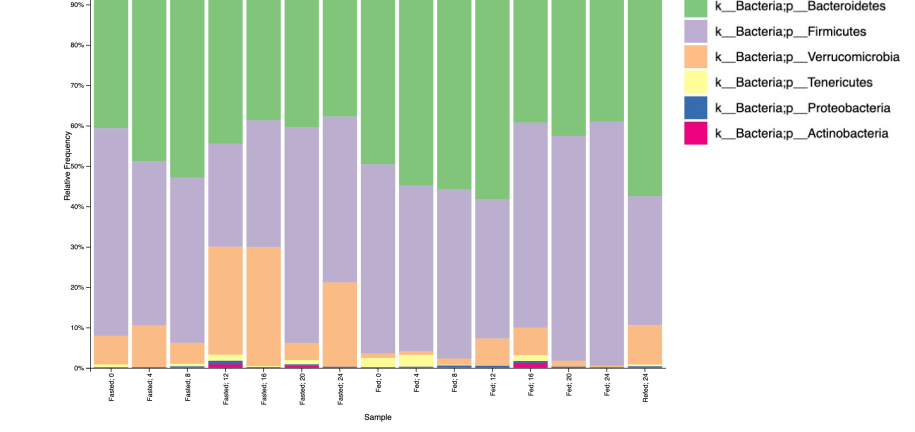

Supplementary Table S1

| <b>CIRCADIAN</b> |                            |                            |
|------------------|----------------------------|----------------------------|
| <b>Target</b>    | <b>Forward</b>             | <b>Reverse</b>             |
| Bmal1            | CCTAATTCTCAGGGCAGCAGAT     | TCCAGTCTTGGCATCAATGAGT     |
| Clock            | GAGGTCGTCCTTCAGCAGTC       | TGTGACATGCCTTGTGGAAT       |
| Cry1             | GACTCACTCACTCAAGCAAG       | TCCTCCCACACGCTTTCGTATC     |
| Cry2             | ATGTGTTCCCAAGGCTGTTT       | CCTCCTTGGCCATCTTCATA       |
| Dbp              | AATGACCTTTGAACCTGATCCCGCT  | GCTCCAGTACTTCTCATCCTTCTGT  |
| Per1             | TGGCTCAAGTGGCAATGAGTC      | GGCTCGAGCTGACTGTTCACT      |
| Per2             | CCATCCACAAGAAGATCCTAC      | GCTCCACGGGTTGATGAAGC       |
| Per3             | GTGACAGCAGAGTCCCATGA       | CACTGCCATCTCGAGTTCAA       |
| Rev-erba         | ACGACCCTGGACTCCAATAA       | CCATTGGAGCTGTCAGTGTAGA     |
| Rev-erbb         | ACAGAAATAGTTACCTGTGCAACT   | GACTTGCTCATAGGACACACCA     |
| Ror-a            | CCCCTACTGTTCCCTTCACCA      | CCAGGTGGGATTTGGATATG       |
| Ror-g            | ACTACGGGGTTATCACCTGTGAG    | GTGCAGGAGTAGGCCACATTAC     |
| <b>OTHER</b>     |                            |                            |
| <b>Target</b>    | <b>Forward</b>             | <b>Reverse</b>             |
| 36B4             | CAGATGCAGCAGATCCGCA        | CGCATCATGGTGTTCCTTGCC      |
| Hmbs             | AAGGGTTTTCCCGTTTGC         | TCCCTGAAGGATGTGCCTA        |
| Cyp7a1           | AGCAACTAAACAACCTGCCAGTACTA | GTCCGGATATTCAAGGATGCA      |
| SREBP1c          | GGAGCCATGGATTGCACATT       | GGCCCGGGAAGTCACTGT         |
| Nampt            | TCGGTTCTGGTGGCGCTTTGCTAC   | AAGTTCCCCGCTGGTGTCTATGT    |
| Fgf21            | CGGCCCTGTAAAGGCTCT         | CGGCCCTGTAAAGGCTCT         |
| Acc1             | GTTCTGTTGGACAACGCCTTCAC    | GGAGTCACAGAAGCAGCCCATT     |
| PPARg            | CTGCTCAAGTATGGTGTCCATGA    | TGAGATGAGGACTCCATCTTTATTCA |
| Angptl4          | GGCTCAGAACAGCAAGATCC       | CCTCTTCCCCTCGAAGTCT        |
| HMGCS2           | CAATGTCACCACAGACCACCAG     | CAATGTCACCACAGACCACCAG     |

# Supplementary Table S2

| Phylum                                                                                                   | Rhythmic            |
|----------------------------------------------------------------------------------------------------------|---------------------|
| k_Bacteria;p_Bacteroidetes                                                                               | Yes                 |
| k_Bacteria;p_Firmicutes                                                                                  | Yes                 |
| k_Bacteria;p_Proteobacteria                                                                              | Fed only            |
| k_Bacteria;p_Actinobacteria                                                                              | Yes                 |
| k_Bacteria;p_Verrucomicrobia                                                                             | Fed only            |
| k_Bacteria;p_Tenericutes                                                                                 | Fast only           |
| k_Bacteria;p_Cyanobacteria                                                                               | insufficient counts |
| <b>Family</b>                                                                                            |                     |
| k_Bacteria;p_Bacteroidetes;c_Bacteroidia;o_Bacteroidales;f_S24-7                                         | Yes                 |
| k_Bacteria;p_Firmicutes;c_Clostridia;o_Clostridiales;f_Ruminococcaceae                                   | No                  |
| k_Bacteria;p_Firmicutes;c_Clostridia;o_Clostridiales;f_                                                  | Fast only           |
| k_Bacteria;p_Firmicutes;c_Clostridia;o_Clostridiales;f_Lachnospiraceae                                   | No                  |
| k_Bacteria;p_Firmicutes;c_Clostridia;o_Clostridiales;f_                                                  | Yes                 |
| k_Bacteria;p_Firmicutes;c_Clostridia;o_Clostridiales;f_Clostridiaceae                                    | insufficient counts |
| k_Bacteria;p_Firmicutes;c_Erysipelotrichi;o_Erysipelotrichales;f_Erysipelotrichaceae                     | No                  |
| k_Bacteria;p_Firmicutes;c_Clostridia;o_Clostridiales;f_Dehalobacteriaceae                                | No                  |
| k_Bacteria;p_Firmicutes;c_Bacilli;o_Turicibacterales;f_Turicibacteraceae                                 | insufficient counts |
| k_Bacteria;p_Firmicutes;c_Clostridia;o_Clostridiales;f_Christensenellaceae                               | insufficient counts |
| k_Bacteria;p_Proteobacteria;c_Betaproteobacteria;o_Burkholderiales;f_Alcaligenaceae                      | Yes                 |
| k_Bacteria;p_Firmicutes;c_Clostridia;o_Clostridiales;f_Peptostreptococcaceae                             | insufficient counts |
| k_Bacteria;p_Actinobacteria;c_Coriobacteriia;o_Coriobacteriales;f_Coriobacteriaceae                      | Fast only           |
| k_Bacteria;p_Verrucomicrobia;c_Verrucomicrobiae;o_Verrucomicrobiales;f_Verrucomicrobiaceae               | Fed only            |
| k_Bacteria;p_Tenericutes;c_Mollicutes;o_Anaeroplasmatales;f_Anaeroplasmataceae                           | Fast only           |
| k_Bacteria;p_Firmicutes;c_Clostridia;o_Clostridiales;f_[Mogibacteriaceae]                                | No                  |
| k_Bacteria;p_Tenericutes;c_Mollicutes;o_RF39;f_                                                          | insufficient counts |
| k_Bacteria;p_Firmicutes;c_Bacilli;o_Lactobacillales;f_Lactobacillaceae                                   | No                  |
| k_Bacteria;p_Proteobacteria;c_Alphaproteobacteria;o_Rickettsiales;f_mitochondria                         | insufficient counts |
| k_Bacteria;p_Proteobacteria;c_Gammaproteobacteria;o_Pseudomonadales;f_Moraxellaceae                      | insufficient counts |
| k_Bacteria;p_Cyanobacteria;c_Chloroplast;o_Streptophyta;f_                                               | insufficient counts |
| k_Bacteria;p_Bacteroidetes;c_Bacteroidia;o_Bacteroidales;f_Bacteroidaceae                                | Yes                 |
| k_Bacteria;p_Firmicutes;c_Bacilli;o_Bacillales;f_Listeriaceae                                            | insufficient counts |
| k_Bacteria;p_Firmicutes;c_Bacilli;o_Bacillales;f_Staphylococcaceae                                       | insufficient counts |
| k_Bacteria;p_Firmicutes;c_Bacilli;o_Lactobacillales;f_Enterococcaceae                                    | insufficient counts |
| k_Bacteria;p_Bacteroidetes;c_Bacteroidia;o_Bacteroidales;f_Rikenellaceae                                 | insufficient counts |
| k_Bacteria;p_Proteobacteria;c_Gammaproteobacteria;o_Enterobacteriales;f_Enterobacteriaceae               | insufficient counts |
| k_Bacteria;p_Actinobacteria;c_Actinobacteria;o_Bifidobacteriales;f_Bifidobacteriaceae                    | insufficient counts |
| <b>Genus</b>                                                                                             |                     |
| k_Bacteria;p_Bacteroidetes;c_Bacteroidia;o_Bacteroidales;f_S24-7;g_                                      | Yes                 |
| k_Bacteria;p_Firmicutes;c_Clostridia;o_Clostridiales;f_Ruminococcaceae;g_Oscillospira                    | No                  |
| k_Bacteria;p_Firmicutes;c_Clostridia;o_Clostridiales;f_Ruminococcaceae;g_Ruminococcus                    | Yes                 |
| k_Bacteria;p_Firmicutes;c_Clostridia;o_Clostridiales;f_;g_                                               | Fast only           |
| k_Bacteria;p_Firmicutes;c_Clostridia;o_Clostridiales;f_Lachnospiraceae;g_Coprococcus                     | Yes                 |
| k_Bacteria;p_Firmicutes;c_Clostridia;o_Clostridiales;f_Lachnospiraceae;g_                                | Yes                 |
| k_Bacteria;p_Firmicutes;c_Clostridia;o_Clostridiales;f_Lachnospiraceae;f_                                | Fed only            |
| k_Bacteria;p_Firmicutes;c_Clostridia;o_Clostridiales;f_Ruminococcaceae;g_                                | Yes                 |
| k_Bacteria;p_Firmicutes;c_Clostridia;o_Clostridiales;f_;                                                 | Yes                 |
| k_Bacteria;p_Firmicutes;c_Clostridia;o_Clostridiales;f_Ruminococcaceae;f_                                | No                  |
| k_Bacteria;p_Firmicutes;c_Clostridia;o_Clostridiales;f_Clostridiaceae;f_                                 | insufficient counts |
| k_Bacteria;p_Firmicutes;c_Clostridia;o_Clostridiales;f_Lachnospiraceae;g_Roseburia                       | insufficient counts |
| k_Bacteria;p_Firmicutes;c_Erysipelotrichi;o_Erysipelotrichales;f_Erysipelotrichaceae;g_Clostridium       | Fed only            |
| k_Bacteria;p_Firmicutes;c_Clostridia;o_Clostridiales;f_Dehalobacteriaceae;g_Dehalobacterium              | No                  |
| k_Bacteria;p_Firmicutes;c_Clostridia;o_Clostridiales;f_Lachnospiraceae;g_[Ruminococcus]                  | Fed only            |
| k_Bacteria;p_Firmicutes;c_Bacilli;o_Turicibacterales;f_Turicibacteraceae;g_Turicibacter                  | insufficient counts |
| k_Bacteria;p_Firmicutes;c_Clostridia;o_Clostridiales;f_Christensenellaceae;g_                            | insufficient counts |
| k_Bacteria;p_Proteobacteria;c_Betaproteobacteria;o_Burkholderiales;f_Alcaligenaceae;g_Sutterella         | Fed only            |
| k_Bacteria;p_Firmicutes;c_Clostridia;o_Clostridiales;f_Peptostreptococcaceae;g_                          | insufficient counts |
| k_Bacteria;p_Actinobacteria;c_Coriobacteriia;o_Coriobacteriales;f_Coriobacteriaceae;g_Adlercreutzia      | Fast only           |
| k_Bacteria;p_Verrucomicrobia;c_Verrucomicrobiae;o_Verrucomicrobiales;f_Verrucomicrobiaceae;g_Akkermansia | Fed only            |
| k_Bacteria;p_Firmicutes;c_Erysipelotrichi;o_Erysipelotrichales;f_Erysipelotrichaceae;g_Allobaculum       | No                  |
| k_Bacteria;p_Tenericutes;c_Mollicutes;o_Anaeroplasmatales;f_Anaeroplasmataceae;g_Anaeroplasma            | insufficient counts |
| k_Bacteria;p_Firmicutes;c_Clostridia;o_Clostridiales;f_[Mogibacteriaceae];g_                             | No                  |

Supplementary Table S2 continued

|                                                                                                         |                     |
|---------------------------------------------------------------------------------------------------------|---------------------|
| k_Bacteria;p_Firmicutes;c_Clostridia;o_Clostridiales;f_Lachnospiraceae;g_Dorea                          | Yes                 |
| k_Bacteria;p_Firmicutes;c_Erysipelotrichi;o_Erysipelotrichales;f_Erysipelotrichaceae;g_                 | insufficient counts |
| k_Bacteria;p_Firmicutes;c_Clostridia;o_Clostridiales;f_Ruminococcaceae;g_Butyricoccus                   | No                  |
| k_Bacteria;p_Tenericutes;c_Mollicutes;o_RF39;f_;g_                                                      | insufficient counts |
| k_Bacteria;p_Firmicutes;c_Bacilli;o_Lactobacillales;f_Lactobacillaceae;g_Lactobacillus                  | No                  |
| k_Bacteria;p_Firmicutes;c_Clostridia;o_Clostridiales;f_Lachnospiraceae;g_Blautia                        | Fast only           |
| k_Bacteria;p_Actinobacteria;c_Coriobacteriia;o_Coriobacteriales;f_Coriobacteriaceae;g_                  | insufficient counts |
| k_Bacteria;p_Proteobacteria;c_Alphaproteobacteria;o_Rickettsiales;f_mitochondria;_                      | insufficient counts |
| k_Bacteria;p_Firmicutes;c_Clostridia;o_Clostridiales;f_Ruminococcaceae;g_Clostridium                    | insufficient counts |
| k_Bacteria;p_Firmicutes;c_Clostridia;o_Clostridiales;f_Lachnospiraceae;g_Clostridium                    | insufficient counts |
| k_Bacteria;p_Firmicutes;c_Clostridia;o_Clostridiales;f_Clostridiaceae;g_Clostridium                     | insufficient counts |
| k_Bacteria;p_Firmicutes;c_Erysipelotrichi;o_Erysipelotrichales;f_Erysipelotrichaceae;g_Coprobacillus    | insufficient counts |
| k_Bacteria;p_Proteobacteria;c_Gammaproteobacteria;o_Pseudomonadales;f_Moraxellaceae;g_Acinetobacter     | insufficient counts |
| k_Bacteria;p_Cyanobacteria;c_Chloroplast;o_Streptophyta;f_;g_                                           | insufficient counts |
| k_Bacteria;p_Bacteroidetes;c_Bacteroidia;o_Bacteroidales;f_Bacteroidaceae;g_Bacteroides                 | Yes                 |
| k_Bacteria;p_Firmicutes;c_Bacilli;o_Bacillales;f_Listeriaceae;g_Listeria                                | insufficient counts |
| k_Bacteria;p_Firmicutes;c_Bacilli;o_Bacillales;f_Staphylococcaceae;g_Staphylococcus                     | insufficient counts |
| k_Bacteria;p_Firmicutes;c_Bacilli;o_Lactobacillales;f_Enterococcaceae;g_Enterococcus                    | insufficient counts |
| k_Bacteria;p_Bacteroidetes;c_Bacteroidia;o_Bacteroidales;f_Rikenellaceae;g_                             | insufficient counts |
| k_Bacteria;p_Proteobacteria;c_Gammaproteobacteria;o_Enterobacteriales;f_Enterobacteriaceae;_            | insufficient counts |
| k_Bacteria;p_Firmicutes;c_Clostridia;o_Clostridiales;f_Lachnospiraceae;g_Anaerostipes                   | No                  |
| k_Bacteria;p_Actinobacteria;c_Actinobacteria;o_Bifidobacteriales;f_Bifidobacteriaceae;g_Bifidobacterium | insufficient counts |

### Figure S1

(A) Housekeeping gene expression. Upper left asterisks indicate results of 2-way repeated measures ANOVA: feeding/time/interaction. All are arrhythmic in the fed and fasted condition.

(B) Results of 2-way repeated measures ANOVA for feeding, time, and their interaction in all gene expression rhythms. \*  $p < 0.05$ , \*\*  $p < 0.01$ , \*\*\*  $p < 0.001$ .

### Figure S2

(A, B) Family level PCoA plots of Bray-Curtis dissimilarities. PERMANOVA was used to determine whether timepoint and feeding had significant effects on microbiome composition.

(A) The effect of time on microbiome composition. Data points are labelled according to feeding group (F = Fed, X = Fast, R = Refed) and coloured by timepoint (see legend).

(B) The effect of feeding condition on microbiome composition. Data points are labelled with timepoint and coloured according to feeding group (see legend).

(C) The effect of time in AL-fed animals.

(D) The effect of time in 24h-fasted animals.

(E) Families whose abundances significantly differed at in the fed condition at particular timepoints ( $p < 0.05$ ) with LDA scores  $>2$ .

(F) Families whose abundances significantly differed at in the fasted condition at particular timepoints ( $p < 0.05$ ) with LDA scores  $>2$ .

### Figure S3

(A) Relative abundances of bacterial families by group.

(B) Relative abundances of bacterial families in individual mice. Mice of the same feeding condition and timepoint were cohoused.

(C) Relative abundances of bacterial phyla by group.

### Table S1

qPCR primers

### Table S2

Rhythmicity of microbial phyla, families and genera determined from CircaCompare analysis of rarefied read counts.
